# Supplementary material
Source: bioRxiv or medRxiv preprint supplement (https://medrxiv.org/highwire/filestream/76851/field_highwire_adjunct_files/2/2020.04.13.20064006-3.pdf)
Supplement: Supplementary file [file 2020.04.13.20064006-3.pdf]

**Additional File 3:** Association analysis between significant CpG sites identified and symptoms reported by patients affected by ATTRm. Information about clinical manifestations (phenotype), effect (beta) and p value are reported. ANS=Autonomic Nervous System; PNS=Peripheral Nervous System; HEART= cardiac involvement; GI=Gastro-intestinal involvement; EYES=ocular involvement; CTS=Carpal Tunnel Syndrome.

| <b>Phenotype</b>    | <b>cg09097335</b> |                | <b>cg13139646</b> |                |
|---------------------|-------------------|----------------|-------------------|----------------|
|                     | <b>beta</b>       | <b>p-value</b> | <b>beta</b>       | <b>p-value</b> |
| <b>ANS</b>          | 0.075             | 0.381          | -0.021            | 0.951          |
| <b>PNS</b>          | -0.063            | 0.694          | 0.927             | 0.125          |
| <b>HEART</b>        | -0.004            | 0.968          | 0.678             | 0.063          |
| <b>GI</b>           | 0.052             | 0.628          | 0.283             | 0.502          |
| <b>EYES</b>         | -0.071            | 0.812          | 0.998             | 0.387          |
| <b>Age of onset</b> | 0.199             | 0.139          | -0.193            | 0.718          |
| <b>CTS</b>          | -0.047            | 0.635          | -0.37             | 0.336          |
| <b>Impotence</b>    | 0.165             | 0.127          | -0.138            | 0.745          |
